# Supplementary material for: Evaluating the Antagonistic Potential of Actinomycete Strains Isolated From Sudan’s Soils Against Phytophthora infestans
Source: Front Microbiol. 2022 Jun 29;13:827824. doi: 10.3389/fmicb.2022.827824 (PMC9277107; doi:10.3389/fmicb.2022.827824)
Supplement: Supplementary file 2 [file Table_1.XLSX]

## Sheet: Sheet1
Table S1: Locations and types of samples from which the Actinomycetes were isolated
No.	Code	Affiliation	State	Location/ City	Soil type	Rhizosphere
1	B1	Streptomyces sp.	Red Sea State	Erkowit	bulk soil	-
2	B2	Streptomyces sp.	Khartoum State	Khartoum	River sediments	-
3	B3	Streptomyces sp.	Khartoum State	Khartoum	River sediments	-
4	B4	Streptomyces sp.	Khartoum State	Khartoum	River sediments	-
5	B5	Streptomyces sp.	Khartoum State	Khartoum	River sediments	-
6	B6	Streptomyces sp.	Khartoum State	Khartoum	River sediments	-
7	B7	Streptomyces sp.	Khartoum State	Khartoum	River sediments	-
8	B8	Streptomyces sp.	Khartoum State	Khartoum	River sediments	-
9	B9	Streptomyces sp.	Khartoum State	Khartoum	River sediments	-
10	B10	Streptomyces sp.	Khartoum State	Khartoum	River sediments	-
11	B13	Streptomyces sp.	Red Sea State	Port Sudan	Rhizosphere	Avicenna marina
12	B14	Streptomyces sp.	Red Sea State	Port Sudan	Rhizosphere	Avicenna marina
13	B15	Streptomyces sp.	Red Sea State	Port Sudan	Rhizosphere	Avicenna marina
14	B17	Streptomyces sp.	Red Sea State	Port Sudan	Rhizosphere	Avicenna marina
15	B18	Streptomyces sp.	Red Sea State	Port Sudan	Rhizosphere	Avicenna marina
16	B19	Streptomyces sp.	Red Sea State	Port Sudan	Rhizosphere	Avicenna marina
17	B21	Streptomyces sp.	Red Sea State	Port Sudan	Rhizosphere	Avicenna marina
18	B22	Streptomyces sp.	Red Sea State	Port Sudan	Rhizosphere	Avicenna marina
19	B23	Streptomyces sp.	Red Sea State	Port Sudan	Rhizosphere	Avicenna marina
20	B25	Streptomyces sp.	Red Sea State	Port Sudan	Rhizosphere	Avicenna marina
21	B28	Streptomyces sp.	Red Sea State	Port Sudan	Rhizosphere	Avicenna marina
22	B29	Streptomyces sp.	Red Sea State	Port Sudan	Rhizosphere	Avicenna marina
23	B30	Streptomyces sp.	Red Sea State	Port Sudan	Rhizosphere	Avicenna marina
24	B32	Streptomyces sp.	Red Sea State	Port Sudan	Rhizosphere	Avicenna marina
25	B33	Streptomyces sp.	Red Sea State	Port Sudan	Rhizosphere	Avicenna marina
26	B34	Streptomyces sp.	Red Sea State	Port Sudan	Rhizosphere	Avicenna marina
27	B35	Streptomyces sp.	Red Sea State	Port Sudan	Rhizosphere	Avicenna marina
28	B37	Streptomyces sp.	Red Sea State	Port Sudan	Rhizosphere	Avicenna marina
29	B38	Streptomyces sp.	Red Sea State	Port Sudan	Rhizosphere	Avicenna marina
30	B39	Streptomyces sp.	Northern State	Dongola	Rhizosphere	Tribulus terrestris
31	B40	Streptomyces sp.	Northern State	Dongola	Rhizosphere	Tribulus terrestris
32	B41	Streptomyces sp.	Northern State	Dongola	Rhizosphere	Tribulus terrestris
33	B42	Streptomyces sp.	Northern State	Dongola	Rhizosphere	Tribulus terrestris
34	B43	Streptomyces sp.	Northern State	Dongola	Rhizosphere	Tribulus terrestris
35	B44	Streptomyces sp.	Northern State	Dongola	Rhizosphere	Tribulus terrestris
36	B45	Streptomyces sp.	Northern State	Dongola	Rhizosphere	Tribulus terrestris
37	B46	Streptomyces sp.	Northern State	Dongola	Rhizosphere	Tribulus terrestris
38	B47	Streptomyces sp.	Gezira State	Wad Albaseer	Rhizosphere	Balanites aegyptiaca
39	B48	Streptomyces sp.	Gezira State	Wad Albaseer	Rhizosphere	Balanites aegyptiaca
40	B49	Streptomyces sp.	Gezira State	Wad Albaseer	Rhizosphere	Balanites aegyptiaca
41	B50	Streptomyces sp.	Northern State	Dongola	Rhizosphere	Corchorus olitorius
42	B51	Streptomyces sp.	Northern State	Dongola	Rhizosphere	Corchorus olitorius
43	B52	Streptomyces sp.	Northern State	Dongola	Rhizosphere	Corchorus olitorius
44	B53	Streptomyces sp.	Northern State	Dongola	Rhizosphere	Corchorus olitorius
45	B54	Streptomyces sp.	Northern State	Dongola	Rhizosphere	Corchorus olitorius
46	B55	Streptomyces sp.	Gezira State	Wad Albaseer	Rhizosphere	Balanites aegyptiaca
47	B56	Nocardiopsis dassonvillei	Northern State	Dongola	Rhizosphere	Corchorus olitorius
48	B57	Streptomyces sp.	Northern State	Dongola	Rhizosphere	Corchorus olitorius
49	B58	Streptomyces sp.	Missing Data	Missing Data	Missing Data	Missing Data
50	B59	Streptomyces sp.	Khartoum State	Khartoum	bulk soil	-
51	B60	Streptomyces sp.	Khartoum State	Khartoum	bulk soil	-
52	B61	Streptomyces sp.	Khartoum State	Omdurman	bulk soil	-
53	B62	Streptomyces sp.	Khartoum State	Khartoum North	bulk soil	-
54	B63	Streptomyces sp.	Khartoum State	Khartoum North	bulk soil	-
55	B64	Streptomyces sp.	Khartoum State	Khartoum North	bulk soil	-
56	B65	Streptomyces sp.	Khartoum State	Khartoum North	bulk soil	-
57	B66	Streptomyces sp.	Khartoum State	Khartoum North	bulk soil	-
58	B67	Nocardiopsis dassonvillei	Khartoum State	Khartoum North	bulk soil	-
59	B68	Streptomyces sp.	Khartoum State	Khartoum North	bulk soil	-
60	B69	Nocardiopsis dassonvillei	Khartoum State	Khartoum North	bulk soil	-
61	B70	Streptomyces sp.	Khartoum State	Khartoum North	bulk soil	-
62	B71	Streptomyces sp.	Khartoum State	Khartoum North	bulk soil	-
63	B72	Streptomyces sp.	Red Sea State	Erkowit	Rhizosphere	Citrullus colocynthis
64	B73	Streptomyces sp.	Red Sea State	Erkowit	Rhizosphere	Citrullus colocynthis
65	B74	Streptomyces sp.	Red Sea State	Erkowit	Rhizosphere	Citrullus colocynthis
66	B75	Streptomyces sp.	Red Sea State	Erkowit	Rhizosphere	Citrullus colocynthis
67	B76	Streptomyces sp.	Red Sea State	Erkowit	Rhizosphere	Citrullus colocynthis
68	B77	Streptomyces sp.	Red Sea State	Erkowit	Rhizosphere	Citrullus colocynthis
69	B78	Streptomyces sp.	Red Sea State	Erkowit	Rhizosphere	Citrullus colocynthis
70	B79	Streptomyces sp.	Red Sea State	Erkowit	Rhizosphere	Citrullus colocynthis
71	B80	Streptomyces sp.	Red Sea State	Erkowit	Rhizosphere	Citrullus colocynthis
72	B81	Streptomyces sp.	Red Sea State	Erkowit	Rhizosphere	Citrullus colocynthis
73	B82	Streptomyces sp.	Red Sea State	Erkowit	Rhizosphere	Citrullus colocynthis
74	B83	Streptomyces sp.	Red Sea State	Erkowit	Rhizosphere	Citrullus colocynthis
75	B84	Streptomyces sp.	Red Sea State	Erkowit	Rhizosphere	Citrullus colocynthis
76	B85	Streptomyces sp.	Red Sea State	Erkowit	Rhizosphere	Citrullus colocynthis
77	B86	Streptomyces sp.	Red Sea State	Erkowit	Rhizosphere	Citrullus colocynthis
78	B87	Streptomyces sp.	Red Sea State	Erkowit	Rhizosphere	Citrullus colocynthis
79	B88	Streptomyces sp.	Red Sea State	Erkowit	Rhizosphere	Citrullus colocynthis
80	B89	Streptomyces sp.	Red Sea State	Erkowit	Rhizosphere	Citrullus colocynthis
81	B90	Streptomyces sp.	Red Sea State	Erkowit	Rhizosphere	Citrullus colocynthis
82	B91	Streptomyces sp.	Red Sea State	Erkowit	Rhizosphere	Citrullus colocynthis
83	B92	Streptomyces sp.	Red Sea State	Erkowit	Rhizosphere	Citrullus colocynthis
84	B93	Streptomyces sp.	Gezira State	Al Bageir	Rhizosphere	Citrus sinensis
85	B94	Streptomyces sp.	Gezira State	Al Bageir	Rhizosphere	Citrus sinensis
86	B95	Saccharothrix espanaensis	Gezira State	Al Bageir	Rhizosphere	Citrus sinensis
87	B96	Streptomyces sp.	Gezira State	Al Bageir	Rhizosphere	Citrus sinensis
88	B97	Streptomyces sp.	Gezira State	Al Bageir	Rhizosphere	Citrus sinensis
89	B98	Streptomyces sp.	Sennar State	Er Roseires	Rhizosphere	Cynodon sp.
90	B99	Streptomyces sp.	Sennar State	Er Roseires	Rhizosphere	Cynodon sp.
91	B100	Streptomyces sp.	Sennar State	Er Roseires	Rhizosphere	Cynodon sp.
92	B101	Nocardiopsis dassonvillei	Sennar State	Er Roseires	Rhizosphere	Cynodon sp.
93	B102	Streptomyces sp.	Sennar State	Er Roseires	Rhizosphere	Cynodon sp.
94	B103	Streptomyces sp.	Sennar State	Er Roseires	Rhizosphere	Cynodon sp.
95	B104	Streptomyces sp.	Sennar State	Er Roseires	Rhizosphere	Cynodon sp.
96	B105	Streptomyces sp.	Sennar State	Er Roseires	Rhizosphere	Cynodon sp.
97	B106	Streptomyces sp.	Sennar State	Er Roseires	Rhizosphere	Cynodon sp.
98	B107	Streptomyces sp.	Sennar State	Er Roseires	Rhizosphere	Cynodon sp.
99	B108	Streptomyces sp.	Sennar State	Er Roseires	Rhizosphere	Cynodon sp.
100	B109	Streptomyces sp.	Sennar State	Er Roseires	Rhizosphere	Cynodon sp.
101	B110	Streptomyces sp.	Sennar State	Er Roseires	Rhizosphere	Acacia oerfota
102	B111	Streptomyces sp.	Sennar State	Er Roseires	Rhizosphere	Acacia oerfota
103	B112	Streptomyces sp.	Sennar State	Er Roseires	Rhizosphere	Acacia oerfota
104	B113	Streptomyces sp.	Sennar State	Er Roseires	Rhizosphere	Acacia oerfota
105	B114	Nocardiopsis dassonvillei	Sennar State	Er Roseires	Rhizosphere	Acacia oerfota
106	B115	Streptomyces sp.	Sennar State	Er Roseires	Rhizosphere	Balanites aegyptiaca
107	B116	Streptomyces sp.	Sennar State	Er Roseires	Rhizosphere	Balanites aegyptiaca
108	B117	Streptomyces sp.	Sennar State	Er Roseires	Rhizosphere	Balanites aegyptiaca
109	B118 G	Streptomyces sp.	Sennar State	Er Roseires	Rhizosphere	Balanites aegyptiaca
110	B118 R	Streptomyces sp.	Sennar State	Er Roseires	Rhizosphere	Balanites aegyptiaca
111	B119	Streptomyces sp.	Sennar State	Er Roseires	Rhizosphere	Dalbergia melanoxylon
112	B120	Streptomyces sp.	Sennar State	Er Roseires	Rhizosphere	Dalbergia melanoxylon
113	B121	Nocardiopsis flavescens	Sennar State	Er Roseires	Rhizosphere	Dalbergia melanoxylon
114	B122	Streptomyces sp.	Sennar State	Er Roseires	Rhizosphere	Dalbergia melanoxylon
115	B123	Nocardiopsis dassonvillei	Sennar State	Er Roseires	Rhizosphere	Dalbergia melanoxylon
116	B124	Streptomyces sp.	Sennar State	Er Roseires	Rhizosphere	Dalbergia melanoxylon
117	B126	Streptomyces sp.	Sennar State	Er Roseires	Rhizosphere	Dalbergia melanoxylon
118	B127	Streptomyces sp.	Sennar State	Er Roseires	Rhizosphere	Dalbergia melanoxylon
119	B128	Streptomyces sp.	Sennar State	Er Roseires	Rhizosphere	Dalbergia melanoxylon
120	B129	Streptomyces sp.	Sennar State	Er Roseires	Rhizosphere	Balanites aegyptiaca
121	B130	Streptomyces sp.	Gezira State	Al Bageir	Rhizosphere	Azadirachta indica
122	B131	Streptomyces sp.	Gezira State	Al Bageir	Rhizosphere	Azadirachta indica
123	B132	Streptomyces sp.	Gezira State	Al Bageir	Rhizosphere	Azadirachta indica
124	B133	Streptomyces sp.	Gezira State	Al Bageir	Rhizosphere	Azadirachta indica
125	B134	Streptomyces sp.	Gezira State	Al Bageir	Rhizosphere	Azadirachta indica
126	B135	Streptomyces sp.	Gezira State	Al Bageir	Rhizosphere	Azadirachta indica
127	B136	Streptomyces sp.	Gezira State	Al Bageir	Rhizosphere	Azadirachta indica
128	B137	Streptomyces sp.	Gezira State	Al Bageir	Rhizosphere	Azadirachta indica
129	B138	Streptomyces sp.	Gezira State	Al Bageir	Rhizosphere	Azadirachta indica
130	B139	Streptomyces sp.	Gezira State	Al Bageir	Rhizosphere	Azadirachta indica
131	B140	Streptomyces sp.	Gezira State	Al Bageir	Rhizosphere	Azadirachta indica
132	B141	Streptomyces sp.	Gezira State	Al Bageir	Rhizosphere	Azadirachta indica
133	B142	Streptomyces sp.	Gezira State	Al Bageir	Rhizosphere	Azadirachta indica
134	B143	Streptomyces sp.	Gezira State	Al Bageir	Rhizosphere	Azadirachta indica
135	B144	Streptomyces sp.	Gezira State	Al Bageir	Rhizosphere	Azadirachta indica
136	B145	Streptomyces sp.	Gezira State	Al Bageir	Rhizosphere	Azadirachta indica
137	B146	Streptomyces sp.	Gezira State	Al Bageir	Rhizosphere	Azadirachta indica
138	B147	Streptomyces sp.	Gezira State	Al Bageir	Rhizosphere	Balanites aegyptiaca
139	B148	Streptomyces sp.	Gezira State	Al Bageir	Rhizosphere	Balanites aegyptiaca
140	B149	Streptomyces sp.	Gezira State	Al Bageir	Rhizosphere	Azadirachta indica
141	B150	Streptomyces sp.	Gezira State	Al Bageir	Rhizosphere	Azadirachta indica
142	B151	Streptomyces sp.	Khartoum State	Khartoum	Rhizosphere	Khaya senegalensis
143	B152	Streptomyces sp.	Khartoum State	Khartoum	Rhizosphere	Khaya senegalensis
144	B153	Streptomyces sp.	Khartoum State	Khartoum	Rhizosphere	Khaya senegalensis
145	B154	Streptomyces sp.	Khartoum State	Khartoum	Rhizosphere	Khaya senegalensis
146	B155	Streptomyces sp.	Khartoum State	Khartoum	Rhizosphere	Khaya senegalensis
147	B156	Streptomyces sp.	Khartoum State	Khartoum	Rhizosphere	Khaya senegalensis
148	B157	Streptomyces sp.	Khartoum State	Khartoum	Rhizosphere	Khaya senegalensis
149	B158	Streptomyces sp.	Khartoum State	Khartoum	Rhizosphere	Khaya senegalensis
150	B159	Streptomyces sp.	Khartoum State	Khartoum	Rhizosphere	Khaya senegalensis
151	B160	Streptomyces sp.	Khartoum State	Khartoum	Rhizosphere	Khaya senegalensis
152	B161	Streptomyces sp.	Khartoum State	Khartoum	Rhizosphere	Khaya senegalensis
153	B162	Streptomyces sp.	Khartoum State	Khartoum	Rhizosphere	Khaya senegalensis
154	B163	Streptomyces sp.	Khartoum State	Khartoum	Rhizosphere	Khaya senegalensis
155	B164	Streptomyces sp.	Khartoum State	Khartoum	Rhizosphere	Khaya senegalensis
156	B165	Streptomyces sp.	Khartoum State	Khartoum	Rhizosphere	Khaya senegalensis
157	B166	Streptomyces sp.	Khartoum State	Khartoum	Rhizosphere	Khaya senegalensis
158	B167	Streptomyces sp.	Khartoum State	Khartoum	Rhizosphere	Khaya senegalensis
159	B168	Streptomyces sp.	Khartoum State	Khartoum	Rhizosphere	Khaya senegalensis
160	B169	Streptomyces sp.	Khartoum State	Khartoum	Rhizosphere	Khaya senegalensis
161	B170	Streptomyces sp.	Sennar State	Er Roseires	Rhizosphere	Acacia oerfota
162	B171	Streptomyces sp.	Sennar State	Er Roseires	Rhizosphere	Acacia oerfota
163	B172	Streptomyces sp.	Sennar State	Er Roseires	Rhizosphere	Acacia oerfota
164	B173	Streptomyces sp.	Sennar State	Er Roseires	Rhizosphere	Acacia oerfota
165	B174	Streptomyces sp.	Sennar State	Er Roseires	Rhizosphere	Acacia oerfota
166	B175	Streptomyces sp.	Sennar State	Er Roseires	Rhizosphere	Acacia oerfota
167	B176	Streptomyces sp.	Sennar State	Er Roseires	Rhizosphere	Acacia oerfota
168	B177	Streptomyces sp.	Sennar State	Er Roseires	Rhizosphere	Acacia oerfota
169	B178	Streptomyces sp.	Sennar State	Er Roseires	Rhizosphere	Acacia oerfota
170	B179	Streptomyces sp.	Sennar State	Er Roseires	Rhizosphere	Acacia oerfota
171	B180	Streptomyces sp.	Sennar State	Er Roseires	Rhizosphere	Acacia oerfota
172	B181	Streptomyces sp.	Sennar State	Er Roseires	Rhizosphere	Acacia oerfota
173	B182	Streptomyces sp.	Sennar State	Er Roseires	Rhizosphere	Acacia oerfota
174	B183	Streptomyces sp.	Sennar State	Er Roseires	Rhizosphere	Acacia oerfota
175	B184	Actinoalloteichus cyanogriseus	Sennar State	Er Roseires	Rhizosphere	Acacia oerfota
