# Supplementary material for: Evaluating the Antagonistic Potential of Actinomycete Strains Isolated From Sudan’s Soils Against Phytophthora infestans
Source: Front Microbiol. 2022 Jun 29;13:827824. doi: 10.3389/fmicb.2022.827824 (PMC9277107; doi:10.3389/fmicb.2022.827824)
Supplement: Supplementary file 5 [file Table_4.XLSX]

## Sheet: Sheet1
Table S4: Inhibition of Phytophthora infestans mycelial growth by Actinomycetes strains
		First independent experiment			Second independent experiment
NO.	Code	Plate 1 inhibition %	Plate 2 inhibition %	Plate 3 inhibition %	Plate 1 inhibition %	Plate 2 inhibition %	Plate 3 inhibition %	Average Inhibition percentage	Average Growth percentage	STDV	STDE	P VALUE	sig.
	Control	-4.60987	10.3028	-6.93362	0.119309	1.03963	0.081784	-4.73695e-15	100	5.94264	2.42607
1	B70	10.9591	0.0324226	6.48644	6.5181	2.27589	7.07725	5.5582	94.4418	3.86181	5.11325	0.0836662	ns
2	B82	3.74057	9.49771	4.18258	9.86607	1.48541	9.98099	6.45889	93.5411	3.75646	2.25514	0.0481486	*
3	B72	10.3545	4.61486	6.37208	4.96747	8.99187	8.57773	7.31309	92.6869	2.3382	7.66973	0.0186322	*
4	B87	7.24666	5.28963	8.98855	6.93242	8.58281	8.30464	7.55745	92.4425	1.36293	4.63873	0.0125423	*
5	B91	1.39247	14.9723	10.9094	3.70485	8.75828	5.74467	7.58033	92.4197	4.97575	0.199555	0.0375937	*
6	B80	1.73835	17.4785	6.42462	3.39759	7.17314	9.97835	7.69842	92.3016	5.59938	4.74916	0.0435443	*
7	B98	10.9341	10.8483	20.3298	1.86302	3.53643	8.34632	9.30964	90.6904	6.57509	9.44219	0.0277463	*
8	B94	18.6311	14.6854	6.25392	4.20288	3.08749	9.43142	9.38204	90.618	6.16286	5.3914	0.0229223	*
9	B83	11.4349	4.41423	14.2605	7.43609	14.8921	4.97611	9.56899	90.431	4.60527	4.01363	0.0109176	*
10	B86	19.3468	15.2089	3.51685	9.35537	7.80656	3.52959	9.79401	90.206	6.37753	2.9479	0.0204046	*
11	B88	12.3039	16.2073	7.66816	12.2185	6.42254	6.11462	10.1558	89.8442	4.04835	2.47199	0.00612668	**
12	B106	16.5149	16.3133	18.9037	3.63181	3.64229	3.48637	10.4154	89.5846	7.53583	2.94089	0.0239669	*
13	B97	16.4845	16.052	18.534	2.64895	6.82646	2.21801	10.4607	89.5393	7.41485	2.32669	0.0224473	*
14	B92	17.5736	14.8734	9.02242	4.2262	11.2621	6.90146	10.6432	89.3568	4.98224	2.16044	0.00722016	**
15	B160	15.2395	11.1919	2.74512	9.37318	19.4925	8.93626	11.1631	88.8369	5.74494	2.016	0.00790368	**
16	B64	7.34388	10.469	5.84019	20.2309	14.4379	9.39878	11.2868	88.7132	5.27963	3.04896	0.00594152	**
17	B109	16.4287	3.11197	18.6936	20.7461	5.02336	4.62875	11.4387	88.5613	8.01283	1.61708	0.0185177	*
18	B29	4.95172	16.548	1.15379	15.459	16.7818	14.0178	11.4853	88.5147	6.7129	3.65005	0.0105462	*
19	B158	7	18.7615	11.9097	8.25693	10.078	13.2485	11.5424	88.4576	4.21269	8.74162	0.00305222	**
20	B28	11.2173	10.9053	10.1967	12.111	14.8883	11.1789	11.7496	88.2504	1.65624	1.33904	0.000887199	***
21	B95	4.94482	10.5144	19.6654	13.3405	10.1811	11.965	11.7685	88.2315	4.8068	0.676159	0.0036524	**
22	B63	2.13844	17.8158	8.01738	17.0648	11.6563	15.1429	11.9726	88.0274	6.04283	2.74053	0.00612004	**
23	B78	22.8911	10.866	12.9387	8.6228	3.08843	14.042	12.0748	87.9252	6.56873	1.38758	0.00750244	**
24	B153	17.1834	16.7164	10.269	6.97901	12.1303	11.5343	12.4687	87.5313	3.90473	6.40121	0.00157322	**
25	B166	21.7051	9.16926	22.1173	5.9959	11.2258	5.37163	12.5975	87.4025	7.52335	3.49053	0.00919715	**
26	B142	17.2238	13.9994	20.0381	7.29974	9.37027	9.268	12.8666	87.1334	5.05693	3.82175	0.00236503	**
27	B102	5.28367	25.6044	20.8972	7.53944	9.54771	9.68099	13.0922	86.9078	8.16676	3.32787	0.00990043	**
28	B76	10.483	11.7901	9.12612	15.1258	12.3633	21.843	13.4552	86.5448	4.57571	3.14912	0.00134683	**
29	B47	13.0544	5.48272	17.7052	20.0215	10.8658	16.3369	13.9111	86.0889	5.26616	2.7609	0.0015826	**
30	B79	5.1171	19.2555	19.383	20.2699	5.41951	15.6044	14.1749	85.8251	7.0828	14.5352	0.00375014	**
31	B74	20.8364	9.67014	1.97635	12.1173	21.1789	19.6397	14.2365	85.7635	7.702	3.38466	0.00497286	**
32	B150	19.5883	19.8892	13.3833	2.36582	12.4444	17.7823	14.2422	85.7578	6.60333	3.65264	0.00283393	**
33	B159	19.2644	16.7461	15.0505	14.2056	6.98765	14.2966	14.4251	85.5749	4.11284	8.54382	0.000633258	***
34	B103	21.2971	23.0647	20.5331	8.9804	6.22816	8.44212	14.7576	85.2424	7.63074	11.3818	0.0038622	**
35	B121	11.3559	19.3799	23.6421	8.61987	15.97	11.1913	15.0265	84.9735	5.71484	13.2604	0.00120791	**
36	B112	35.5771	35.8704	3.52848	2.55638	4.98529	9.66486	15.3637	84.6363	15.9587	2.36909	0.0515668	ns
37	B59	21.3095	6.0916	21.7382	12.4668	14.807	16.6403	15.5089	84.4911	5.86795	11.3036	0.00106033	**
38	B157	14.7038	31.2977	28.785	12.0151	12.2034	2.48973	16.9158	83.0842	11.0177	2.1499	0.00787934	**
39	B13	28.9589	21.1304	17.5833	13.1062	13.4719	14.9908	18.2069	81.7931	6.05512	17.027	0.000369841	***
40	B151	19.9241	20.2409	13.777	20.6782	21.2185	16.2126	18.6752	81.3248	2.9849	14.2571	4.3045e-05	***
41	B60	18.4928	16.0405	25.7692	15.3298	17.173	20.4696	18.8792	81.1208	3.83976	4.34379	6.58752e-05	***
42	B17	17.0252	17.0924	18.6822	30.066	17.5169	16.0479	19.4051	80.5949	5.29199	1.94734	0.000136889	***
43	B14	26.492	24.4372	27.6154	15.4274	12.944	11.6771	19.7655	80.2345	7.20367	5.95748	0.000410401	***
44	B104	35.4783	26.1024	27.687	13.153	10.6022	9.01141	20.339	79.661	10.8735	4.26268	0.00243631	**
45	B53	23.8712	12.9216	10.1742	18.5626	18.3531	39.5094	20.5654	79.4346	10.4414	13.1301	0.00184921	**
46	B118 G	8.68967	15.2587	13.5178	20.041	14.1622	52.9328	20.767	79.233	16.1712	5.56997	0.0144707	*
47	B30	22.9029	26.5767	20.0563	18.49	19.561	17.2581	20.8075	79.1925	3.39886	1.69481	2.19783e-05	***
48	B77	12.7008	21.2741	26.8427	24.1018	21.0818	20.124	21.0209	78.9791	4.76405	16.957	4.978e-05	***
49	B137	21.8337	17.3772	32.4223	29.8497	12.4173	15.0244	21.4874	78.5126	8.13082	2.39558	0.000386396	***
50	B41	25.7623	22.3342	8.28611	14.1717	28.9039	31.443	21.8169	78.1831	8.9471	1.56758	0.000557182	***
51	B115	11.0496	4.0091	10.6957	31.8754	43.1513	32.6644	22.2409	77.7591	15.6822	3.10543	0.00874241	**
52	B117	15.9752	24.9495	28.3204	29.1651	9.27198	26.6108	22.3822	77.6178	7.98335	15.3276	0.000258597	***
53	B155	27.673	24.9138	29.6776	20.1014	15.2762	18.3177	22.66	77.34	5.64586	2.46698	4.91051e-05	***
54	B130	31.1663	13.7362	1.51987	34.1592	24.5777	31.4681	22.7713	77.2287	12.7461	2.1554	0.00265967	**
55	B122	11.6766	3.34964	21.9981	33.9673	32.6413	34.9591	23.0987	76.9013	13.2027	19.6644	0.00292339	**
56	B154	24.2621	22.8691	65.997	5.92498	11.3021	13.1128	23.9113	76.0887	21.7785	1.33955	0.0267419	*
57	B169	9	22.0202	11.6733	95.1777	7.05356	-0.429426	24.0826	75.9174	35.5839	19.1065	0.133068	ns
58	B163	18.0235	36.0795	40.4032	34.5223	7.07404	12.1665	24.7115	75.2885	14.035	1.57658	0.00263693	**
59	B132	18.5265	21.6261	23.2866	31.0245	23.4281	30.8341	24.7877	75.2123	5.07458	11.7302	1.51921e-05	***
60	B35	16.8169	24.014	15.5584	26.3805	32.6779	35.7018	25.1916	74.8084	8.1516	0.954566	0.000113135	***
61	B34	23.5506	20.623	13.9524	29.6546	23.8611	41.5405	25.5304	74.4696	9.36134	14.7413	0.00021545	***
62	B134	29.6332	53.1404	26.0224	13.0198	21.0179	12.3891	25.8705	74.1295	15.0218	3.14433	0.0028538	**
63	B18	25.9511	24.1887	33.2553	30.7824	22.3557	20.5193	26.1754	73.8246	4.93816	16.4661	8.5341e-06	***
64	B105	36.9233	26.2287	26.7294	26.8319	22.7584	19.5404	26.502	73.498	5.85349	1.86803	1.49784e-05	***
65	B161	23.9022	31.1465	21.7162	26.3336	38.5739	18.9771	26.7749	73.2251	7.11575	1.94492	3.39821e-05	***
66	B21	23.7336	32.3986	26.3652	21.1783	28.2567	28.7466	26.7798	73.2202	3.96102	2.68167	3.44497e-06	***
67	B120	34.9693	25.7505	28.3841	21.0085	25.2264	27.6141	27.1588	72.8412	4.60992	2.89154	4.83538e-06	***
68	B118 R	45.7726	45.0559	48.6584	2.83699	12.2686	9.58434	27.3628	72.6372	21.2174	2.28594	0.0124223	*
69	B140	32.9537	25.9762	21.4877	40.4885	25.343	23.5598	28.3015	71.6985	7.11671	4.76781	2.11796e-05	***
70	B22	30.148	37.5881	30.0264	11.5395	33.428	28.1777	28.4846	71.5154	8.94076	1.53357	6.90221e-05	***
71	B143	56.8598	45.9583	21.6729	19.6476	17.1965	12.9168	29.042	70.958	17.9047	1.88009	0.00365628	**
72	B33	19.9332	18.5358	37.0061	34.7935	37.4546	26.8282	29.0919	70.9081	8.55003	11.6	4.49246e-05	***
73	B10	22.6006	33.953	24.5659	35.3008	38.2466	21.8307	29.4163	70.5837	7.22084	15.2463	1.63395e-05	***
74	B149	11.3685	9.42879	60.627	30.1853	22.9226	42.6527	29.5308	70.4692	19.5817	2.60361	0.00540304	**
75	B61	41.6193	28.1342	34.6686	22.2173	22.4404	33.5271	30.4345	69.5655	7.60672	0.556415	1.60107e-05	***
76	B9	22.0495	27.6302	21.1794	47.6398	31.929	35.2006	30.9381	69.0619	9.83135	1.65273	6.10297e-05	***
77	B126	10.0785	11.0031	10.1037	57.5237	32.317	65.5747	31.1001	68.8999	25.1985	11.9817	0.0147237	*
78	B152	16.902	24.5732	28.7972	80.9834	16.5987	20.6838	31.423	68.577	24.7224	8.95559	0.0127388	*
79	B32	29.9871	36.4045	61.0931	27.2624	19.9548	18.1438	32.1409	67.8591	15.6797	2.03134	0.000847754	***
80	B8	26.8278	16.4173	19.0723	43.2365	39.5053	47.9023	32.1603	67.8397	13.2062	2.03399	0.000284954	***
81	B6	47.3037	22.9819	35.4105	26.0135	20.2815	45.4638	32.9092	67.0908	11.633	4.11299	0.000105391	***
82	B84	72.4328	49.8396	49.2309	18.5165	1.2769	6.18991	32.9144	67.0856	28.4142	2.51598	0.0195392	*
83	B55	14.3978	32.9505	24.3818	54.9478	35.4718	37.8222	33.3287	66.6713	13.6436	1.96237	0.000267042	***
84	B90	33.9863	69.2131	31.6679	13.4657	8.96235	44.6234	33.6531	66.3469	21.9366	2.43335	0.00463522	**
85	B127	13.2711	14.4134	12.3708	46.1767	65.4086	51.1018	33.7904	66.2096	23.2728	3.0271	0.00626899	**
86	B131	59.4917	65.063	54.0197	13.7345	12.2098	2.42206	34.4901	65.5099	27.9169	2.68427	0.01429	*
87	B147	49.7275	39.519	37.3701	36.3352	15.9053	28.2403	34.5162	65.4838	11.4334	2.2365	6.38068e-05	***
88	B44	10.5148	20.7079	11.5673	94.7891	22.9775	49.2471	34.9673	65.0327	32.4812	10.5992	0.0267693	*
89	B165	19.9464	68.0274	65.5712	4.1234	32.6882	23.019	35.5626	64.4374	25.8935	3.33407	0.00830401	**
90	B100	42.5764	66.976	65.1059	5.33925	17.2664	20.8306	36.3491	63.6509	25.9628	3.11524	0.00745336	**
91	B156	45.4152	56.0028	59.8212	25.9129	20.262	11.1102	36.4207	63.5793	20.12	4.43908	0.00168314	**
92	B15	29.5632	35.92	34.6491	38.606	36.6559	46.8854	37.0466	62.9534	5.69921	2.38968	6.47626e-07	***
93	B37	41.0676	42.3237	22.685	42.7243	40.9564	35.8136	37.5951	62.4049	7.71374	3.07649	2.64456e-06	***
94	B3	63.0938	58.7486	24.1731	19.7126	38.5623	24.6301	38.1534	61.8466	18.7869	10.3924	0.000788621	***
95	B141	48.4138	50.9093	50.1945	26.1764	28.4024	31.424	39.2534	60.7466	11.7434	0.422292	2.58447e-05	***
96	B46	35.7518	17.1307	18.7299	88.2312	57.2003	25.2214	40.3776	59.6224	27.688	3.27122	0.00579806	**
97	B85	93.3404	64.0652	65.6561	8.87127	6.12071	11.8836	41.6562	58.3438	37.3456	1.55241	0.0223794	*
98	B116	60.1893	97.5944	97.9066	3.36319	2.84321	7.43014	44.8878	55.1122	46.2995	5.7553	0.0402626	*
99	B136	52.2667	49.4918	46.0576	40.7072	43.9784	37.4761	44.9963	55.0037	5.48053	6.51509	8.71986e-08	***
100	B73	42.8271	91.8044	78.9098	47.4045	2.743	7.81318	45.2503	54.7497	36.1086	15.6635	0.0127012	*
101	B107	90.6722	52.9824	19.9647	32.8233	28.499	52.1765	46.1863	53.8137	25.456	6.40222	0.00149451	**
102	B71	64.6163	86.5138	65.3794	23.8243	25.8398	16.4443	47.103	52.897	28.733	18.9017	0.00280971	**
103	B167	59.1994	61.0118	71.5048	32.3502	28.0957	31.7191	47.3135	52.6865	18.7112	3.25919	0.000150397	***
104	B81	55.7695	45.8219	60.4346	52.5866	42.2674	27.7459	47.4376	52.5624	11.6787	8.66197	4.72707e-06	***
105	B42	74.0311	22.2263	50.8046	62.5919	63.0838	27.4025	50.0234	49.9766	20.928	6.60187	0.000217732	***
106	B1	56.1562	49.5194	71.07	34.5861	50.4731	41.8341	50.6065	49.3935	12.5249	10.3715	4.38693e-06	***
107	B124	94.3018	90.7355	96.114	5.20828	9.78781	9.54685	50.949	49.051	46.9103	1.88199	0.0247645	*
108	B75	50.4363	97.4625	96.3583	6.40742	7.06511	50.9846	51.4524	48.5476	40.3336	2.33308	0.0114173	*
109	B128	44.7889	28.3641	63.5173	65.0855	51.3257	57.4042	51.7476	48.2524	13.7391	5.38998	7.13423e-06	***
110	B89	57.9912	73.7584	92.3954	11.6907	48.3418	29.0267	52.2007	47.7993	29.3491	19.1511	0.00163691	**
111	B62	61.4856	95.7878	98.3012	20.9035	23.2666	18.6662	53.0685	46.9315	37.5447	10.2873	0.00655055	**
112	B65	97.3285	97.7208	96.7605	5.56773	14.165	8.68752	53.3717	46.6283	48.1678	9.50109	0.022556	*
113	B68	96.0958	96.3214	95.7901	13.8406	8.88449	9.31992	53.3754	46.6246	46.8011	5.60896	0.0197424	*
114	B146	59.6419	57.5076	77.609	39.8612	43.1727	44.2305	53.6705	46.3295	14.2369	0.83533	6.7438e-06	***
115	B119	39.8952	53.7645	15.6298	67.7142	79.3578	81.5087	56.3117	43.6883	25.4048	5.20357	0.000354195	***
116	B54	64.8572	95.9577	96.7566	29.0253	31.5041	32.6654	58.4611	41.5389	32.1621	11.397	0.00138102	**
117	B58	21.2036	15.1228	26.3478	96.2525	96.3738	96.714	58.6691	41.3309	41.536	2.07169	0.00649272	**
118	B48	95.8672	97.3284	97.7158	22.9626	17.7856	21.9452	58.9341	41.0659	41.7074	14.3917	0.00647516	**
119	B39	83.7011	94.9373	94.2173	19.0709	27.0174	34.9367	58.9801	41.0199	35.6038	6.13261	0.0025087	**
120	B168	46.5033	46.9802	53.7551	26.385	92.5023	93.8255	59.9919	40.0081	27.2808	2.69224	0.000366404	***
121	B133	92.8132	90.9186	97.2748	31.6036	24.2103	33.1506	61.6619	38.3381	35.2524	2.23742	0.00175786	**
122	B96	65.1325	55.1644	65.4732	71.0465	58.2932	58.2877	62.2329	37.7671	5.96047	3.31939	5.64695e-09	***
123	B43	60.7313	14.2619	48.6746	86.1349	86.4233	77.8113	62.3396	37.6604	27.8797	3.18408	0.000320503	***
124	B113	98.5281	98.6555	98.8602	23.0259	31.2384	32.3773	63.7809	36.2191	38.3675	9.14643	0.00242292	**
125	B99	68.2683	63.453	72.2253	66.7728	59.4448	57.8273	64.6653	35.3347	5.47828	2.90539	2.61763e-09	***
126	B144	77.2672	93.1843	92.8117	49.9869	42.8878	36.0341	65.362	34.638	25.577	4.7942	0.000116112	***
127	B49	36.4058	30.6576	33.548	97.3699	96.6013	97.6502	65.3721	34.6279	34.9225	2.06448	0.00110789	**
128	B50	83.3516	63.8342	75.6271	57.3254	59.3077	59.0292	66.4125	33.5875	10.6401	7.30956	1.06691e-07	***
129	B139	84.8556	85.0269	80.6984	26.6857	68.2776	59.708	67.542	32.458	22.4041	10.4418	3.15057e-05	***
130	B138	71.6493	76.7345	78.6665	62.7143	63.8068	60.2024	68.9623	31.0377	7.79937	4.72762	9.18093e-09	***
131	B51	68.6856	60.2783	69.6447	69.0948	73.0372	73.5705	69.0519	30.9481	4.76999	5.81219	7.73149e-10	***
132	B162	79.657	67.4959	75.3765	61.6833	69.0982	62.4728	69.2973	30.7027	7.10087	4.66767	5.01942e-09	***
133	B7	81.9882	93.2095	95.4234	57.4251	50.2152	41.7807	70.007	29.993	23.1285	0.57643	2.99259e-05	***
134	B174	95.3618	95.2972	92.5152	54.1298	48.7672	37.8872	70.6597	29.3403	26.5383	7.99419	8.19976e-05	***
135	B52	98.1241	64.8593	75.7934	63.4606	57.633	65.2597	70.855	29.145	14.5928	2.6958	6.50869e-07	***
136	B171	76.2514	80.3898	75.9319	66.305	68.0352	70.8279	72.9569	27.0431	5.4398	1.21858	7.78158e-10	***
137	B40	85.8755	65.191	80.2859	67.43	67.3961	71.8137	72.9987	27.0013	8.2907	10.0929	7.75635e-09	***
138	B135	84.2278	64.1579	71.0052	72.6335	76.0279	72.1485	73.3668	26.6332	6.59461	1.5941	1.90587e-09	***
139	B4	83.4449	79.0307	83.7269	54.1854	77.6862	68.4115	74.4143	25.5857	11.3625	8.89105	5.85336e-08	***
140	B38	71.1019	66.4453	72.8563	76.7458	84.0542	82.2576	75.5768	24.4232	6.76279	2.30491	1.63567e-09	***
141	B145	85.2512	90.4767	81.9624	64.5161	63.6069	68.6003	75.7356	24.2644	11.5803	8.21397	5.70762e-08	***
142	B93	90.2217	86.8726	80.1966	78.2488	61.7738	74.3331	78.6078	21.3922	10.0747	4.49794	1.4263e-08	***
143	B23	66.4108	77.0625	42.7779	95.2923	96.6297	94.5633	78.7894	21.2106	21.4125	1.71982	5.69467e-06	***
144	B19	80.9806	76.4751	70.8943	81.7178	93.3152	83.0329	81.0693	18.9307	7.46839	1.67906	1.45785e-09	***
145	B45	87.8661	87.6139	86.9071	79.0313	74.2559	78.7496	82.404	17.596	5.80307	2.34536	3.17237e-10	***
146	B173	96.9371	98.268	98.3738	66.305	68.0352	70.8279	83.1245	16.8755	16.2139	2.90499	3.44592e-07	***
147	B164	81.7341	82.576	79.5563	86.8344	84.5771	86.1197	83.5663	16.4337	2.77992	2.89892	2.68658e-11	***
148	B57	81.3033	80.6568	84.5822	80.6532	82.8533	91.4759	83.5875	16.4125	4.15142	5.72975	7.19393e-11	***
149	B111	97.9537	98.1115	98.4209	69.1404	70.6346	93.1581	87.9032	12.0968	14.0976	1.1349	6.43921e-08	***
150	B176	90.6577	94.6016	94.2005	82.2623	82.0705	86.3634	88.3594	11.6406	5.64046	10.571	1.39338e-10	***
151	B178	95.0052	95.4879	95.4941	90.179	87.3222	85.1317	91.4367	8.56332	4.55792	3.07139	4.08713e-11	***
152	B2	95.5267	94.8349	82.3616	91.7139	95.4784	97.677	92.9321	7.06792	5.52394	7.63882	7.68495e-11	***
153	B66	91.9809	93.5261	99.4807	92.61	90.7247	90.6853	93.1679	6.83205	3.28121	11.1373	1.28165e-11	***
154	B170	95.3457	88.9629	94.4656	95.1186	92.6748	92.6054	93.1955	6.80451	2.38617	14.5271	7.16432e-12	***
155	B110	97.0521	92.1655	96.4872	94.5739	94.7116	86.6858	93.6127	6.38731	3.80262	0.974149	1.79182e-11	***
156	B148	95.0088	92.1944	92.7847	95.4068	94.4349	92.3971	93.7044	6.29555	1.41196	2.22079	4.24365e-12	***
157	B179	96.7121	91.0475	93.7273	94.6368	93.2252	93.047	93.7326	6.26735	1.87788	1.03832	5.16769e-12	***
158	B182	96.4241	90.7696	92.5807	96.7146	92.7449	98.4109	94.6075	5.39254	2.98371	6.61928	8.96886e-12	***
159	B129	92.1563	92.6479	94.1929	96.7734	96.1846	96.5735	94.7548	5.24522	2.04613	10.8342	5.04504e-12	***
160	B177	97.4439	96.9822	96.8165	94.4825	93.7366	90.6836	95.0242	4.97578	2.59587	1.01723	6.693e-12	***
161	B180	96.2509	96.4257	95.9528	94.0728	91.8669	98.165	95.4557	4.54429	2.18872	2.30271	5.05584e-12	***
162	B175	97.6512	97.8858	97.8268	93.4146	93.1662	93.1516	95.516	4.48398	2.49171	1.05976	5.97051e-12	***
163	B172	98.107	97.3086	97.9208	95.1186	92.6748	92.6054	95.6225	4.37746	2.54336	1.86076	6.09073e-12	***
164	B25	96.8036	97.5818	97.3244	96.4197	89.2433	97.7829	95.8593	4.14073	3.27996	0.766641	9.65325e-12	***
165	B181	97.1389	97.7267	96.4845	95.1117	94.8145	94.2706	95.9245	4.07552	1.39028	0.893541	3.33557e-12	***
166	B183	96.6141	97.058	97.7747	96.112	97.2848	97.0562	96.9833	3.0167	0.569847	0.56758	2.40167e-12	***
167	B108	98.7882	98.2571	98.6569	98.1723	96.7909	96.2909	97.826	2.17397	1.0344	1.21809	2.4425e-12	***
168	B5	97.8937	97.35	97.642	98.5924	98.5305	97.982	97.9985	2.00154	0.488809	0.232639	2.13965e-12	***
